# Supplementary material for: Allele Identification for Transcriptome-Based Population Genomics in the Invasive Plant Centaurea solstitialis
Source: PubMed Central journal article supplement (PMC3564996; doi:10.1534/g3.112.003871), 2013-02-01
Supplement: supp_3.2.359_FigureS1.pdf [file supp_3.2.359_FigureS1.pdf]

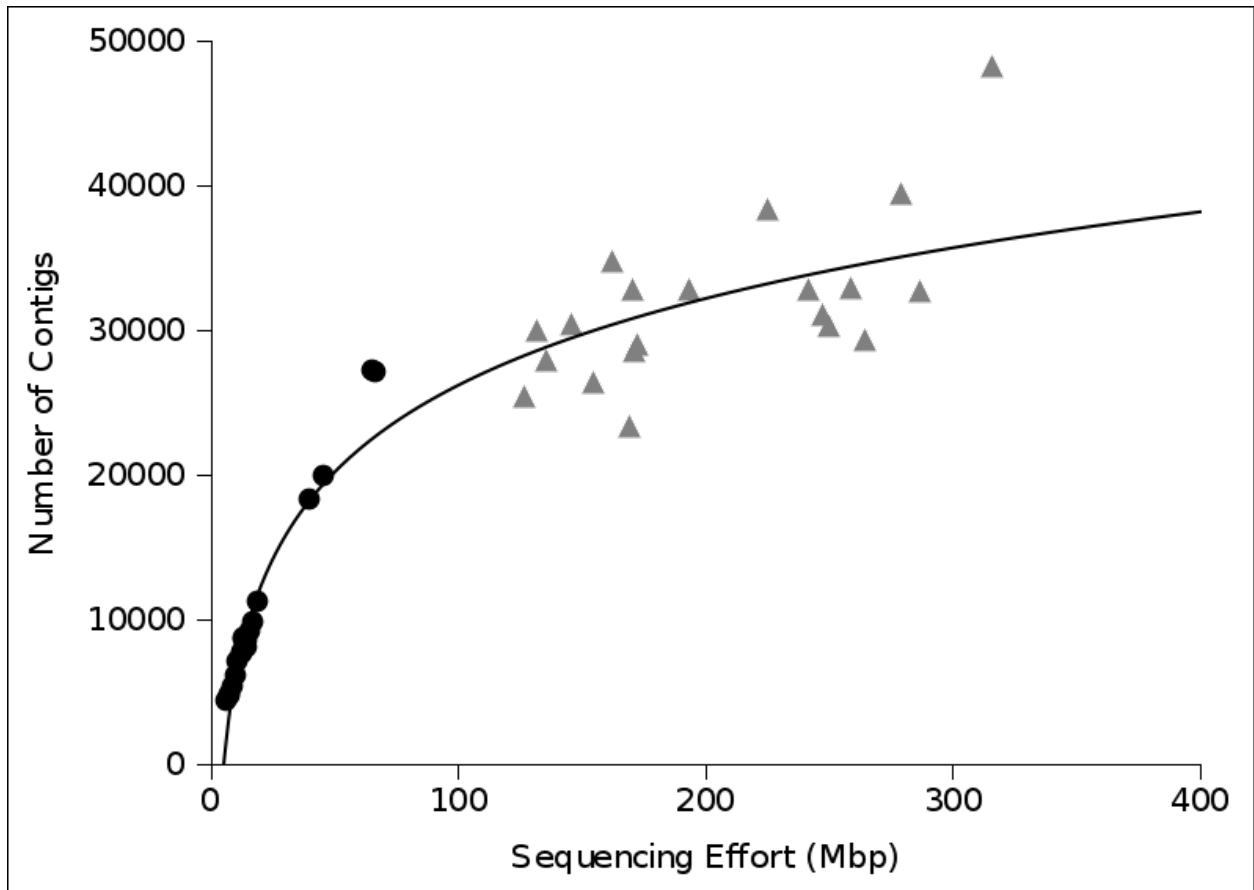

**Figure S1** Contig numbers in transcriptome libraries sequenced with GS FLX Titanium (triangles) and GS FLX (circles) sequencing chemistry, as a function of total sequence effort after cleaning by SnoWhite. A logarithmic fit is shown for variation across all individuals.
