# Supplementary material for: Allele Identification for Transcriptome-Based Population Genomics in the Invasive Plant Centaurea solstitialis
Source: PubMed Central journal article supplement (PMC3564996; doi:10.1534/g3.112.003871), 2013-02-01
Supplement: supp_3.2.359_FigureS4.pdf [file supp_3.2.359_FigureS4.pdf]

**A**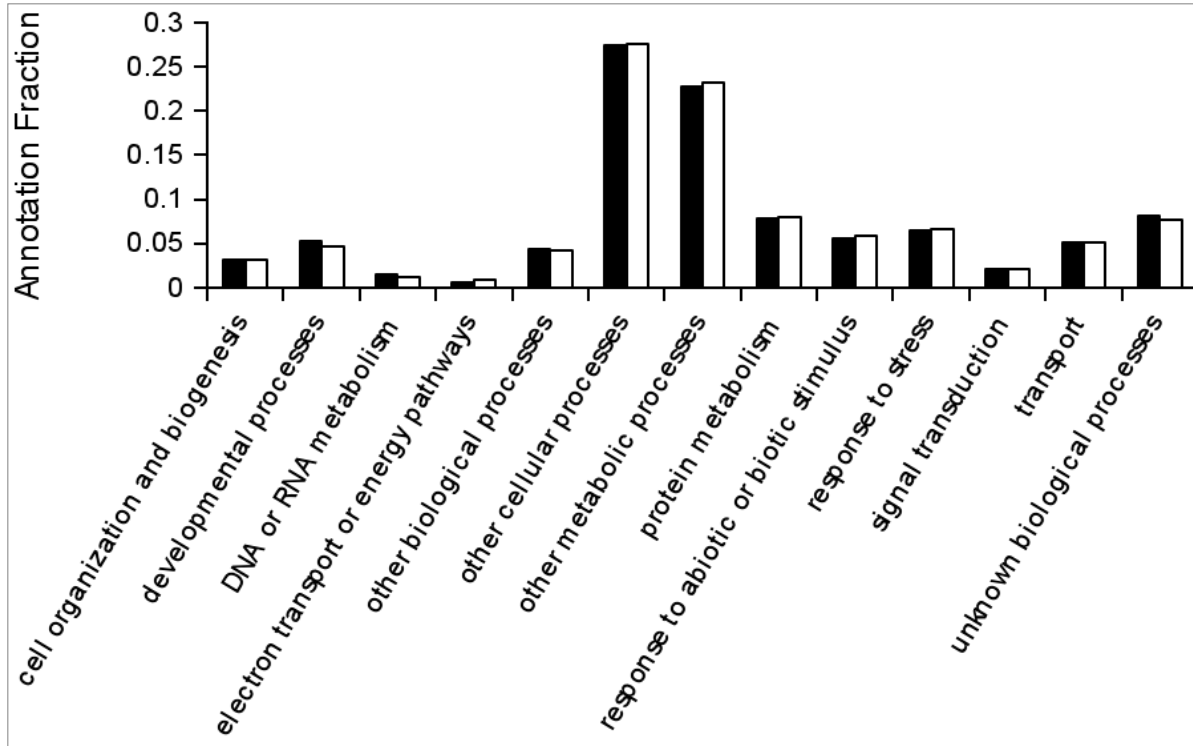**B**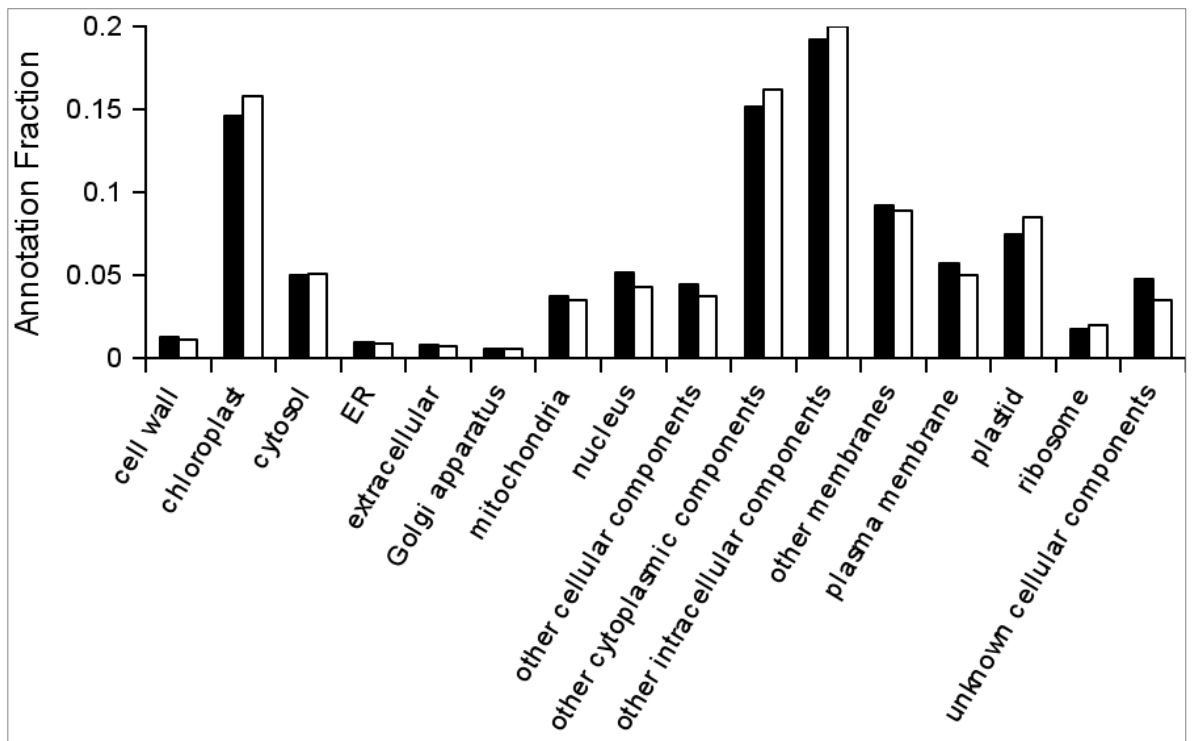

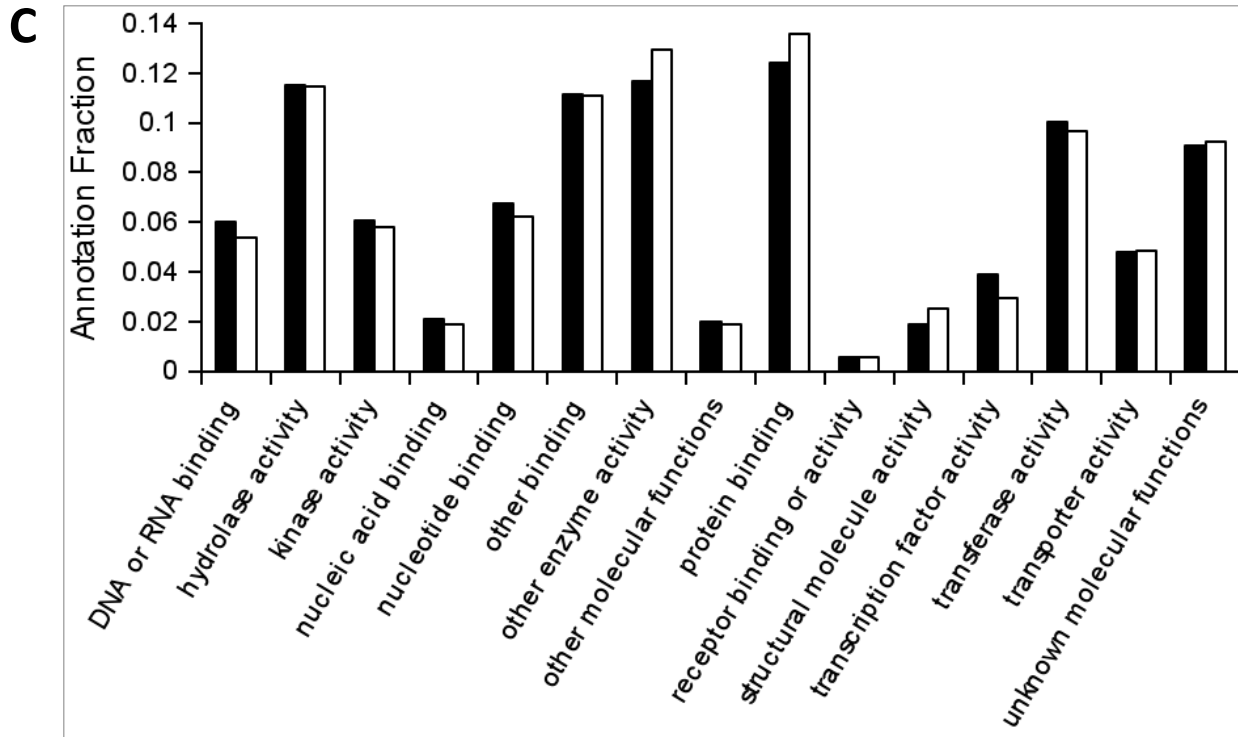

**Figure S4** GO Slim annotation categories for all clusters (dark bars) and inferred single loci (open bars) within the (A) Biological Processes, (B) Cellular Components, and (C) Molecular Function categories.
